# Supplementary material
Source: PubMed Central journal article supplement (PMC3787717)

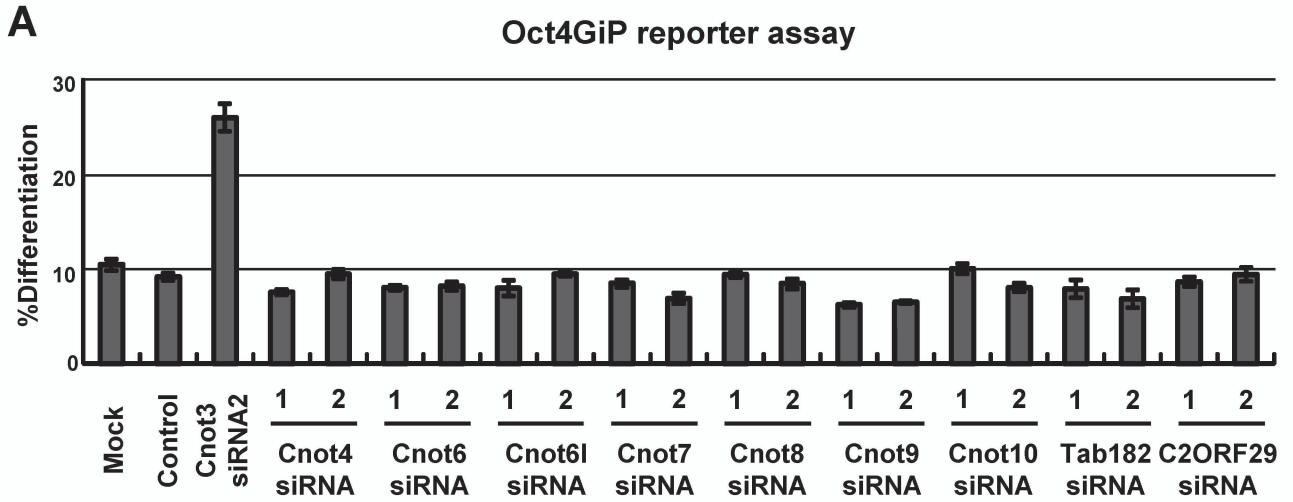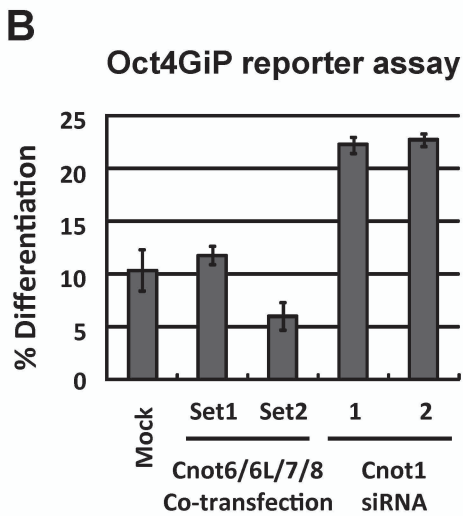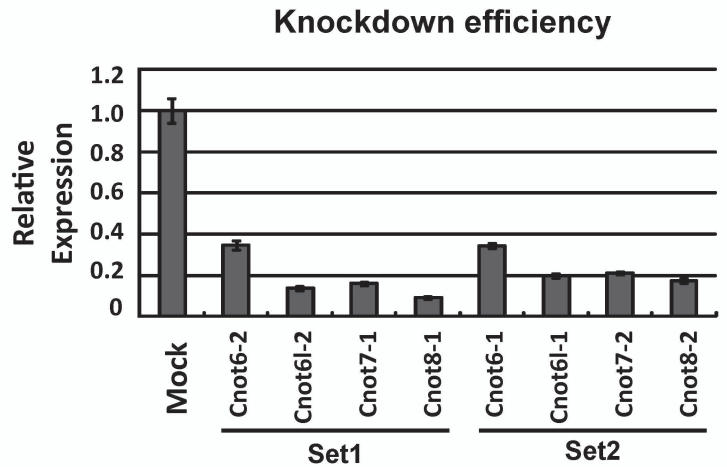



**A**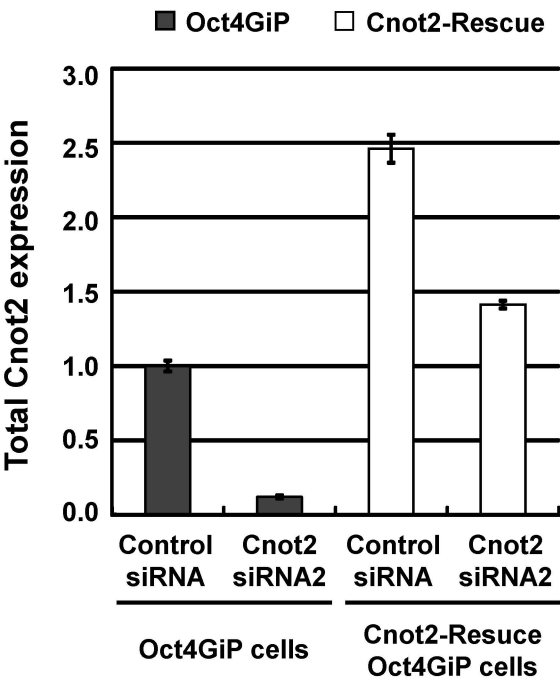**B**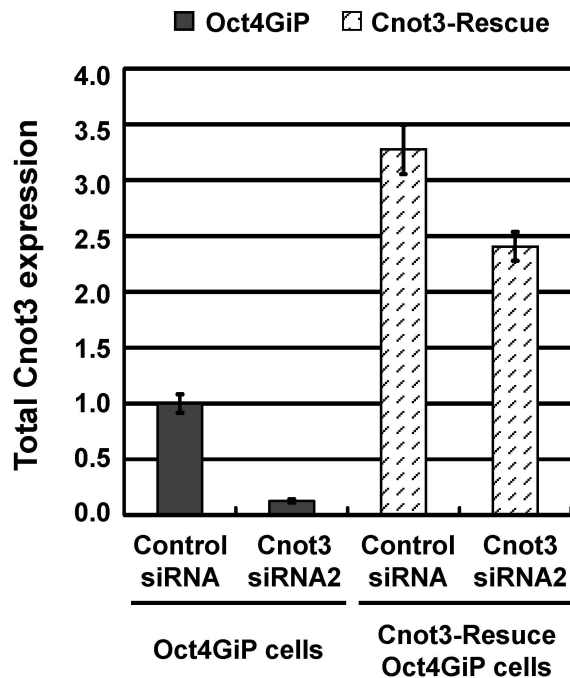

**E14-Mock**

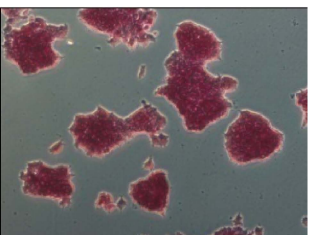

**Cnot1-1 SiRNA1**

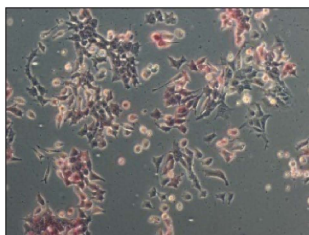

**Cnot2-2 SiRNA2**

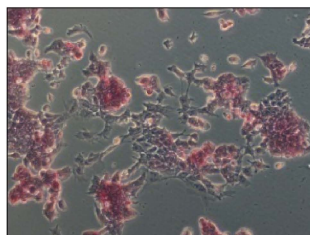

**Cnot3-2 SiRNA2**

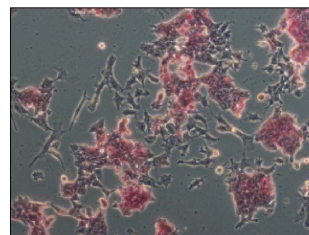

**J1-Mock**

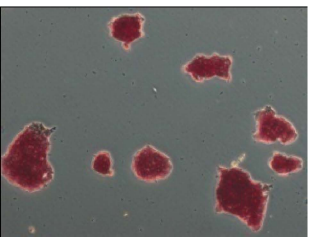

**Cnot1-1 SiRNA1**

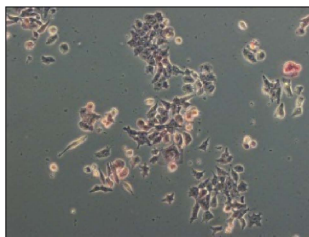

**Cnot2-2 SiRNA2**

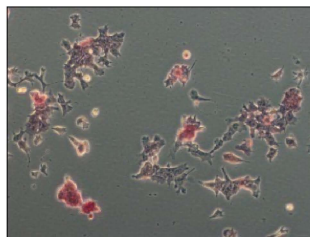

**Cnot3-2 SiRNA2**

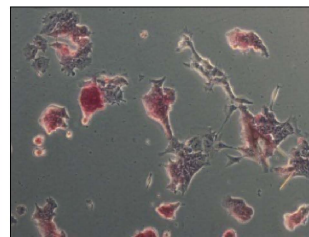

A

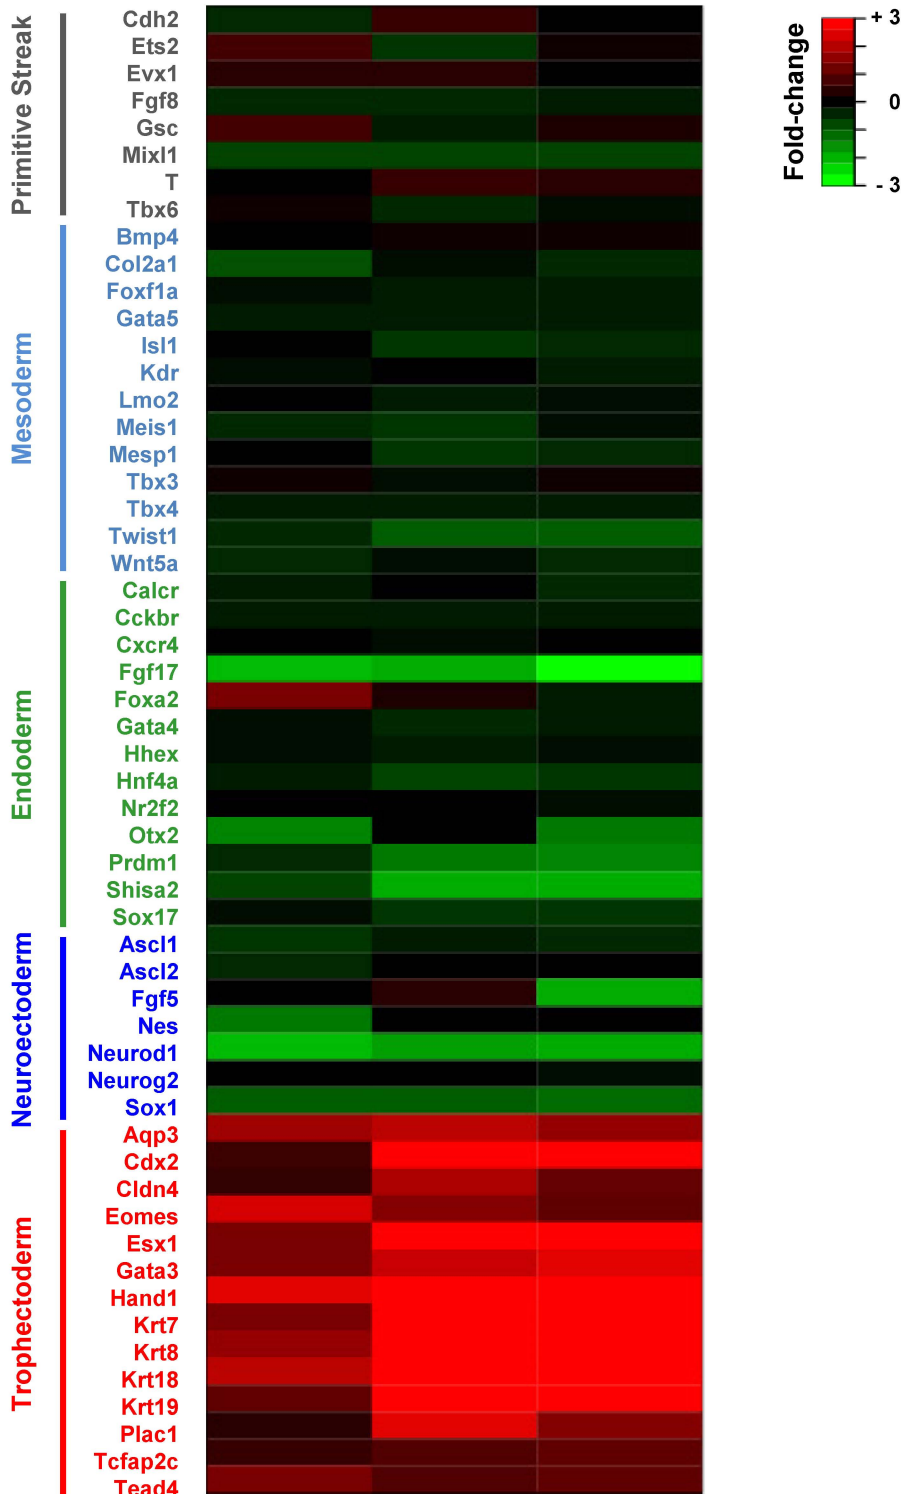

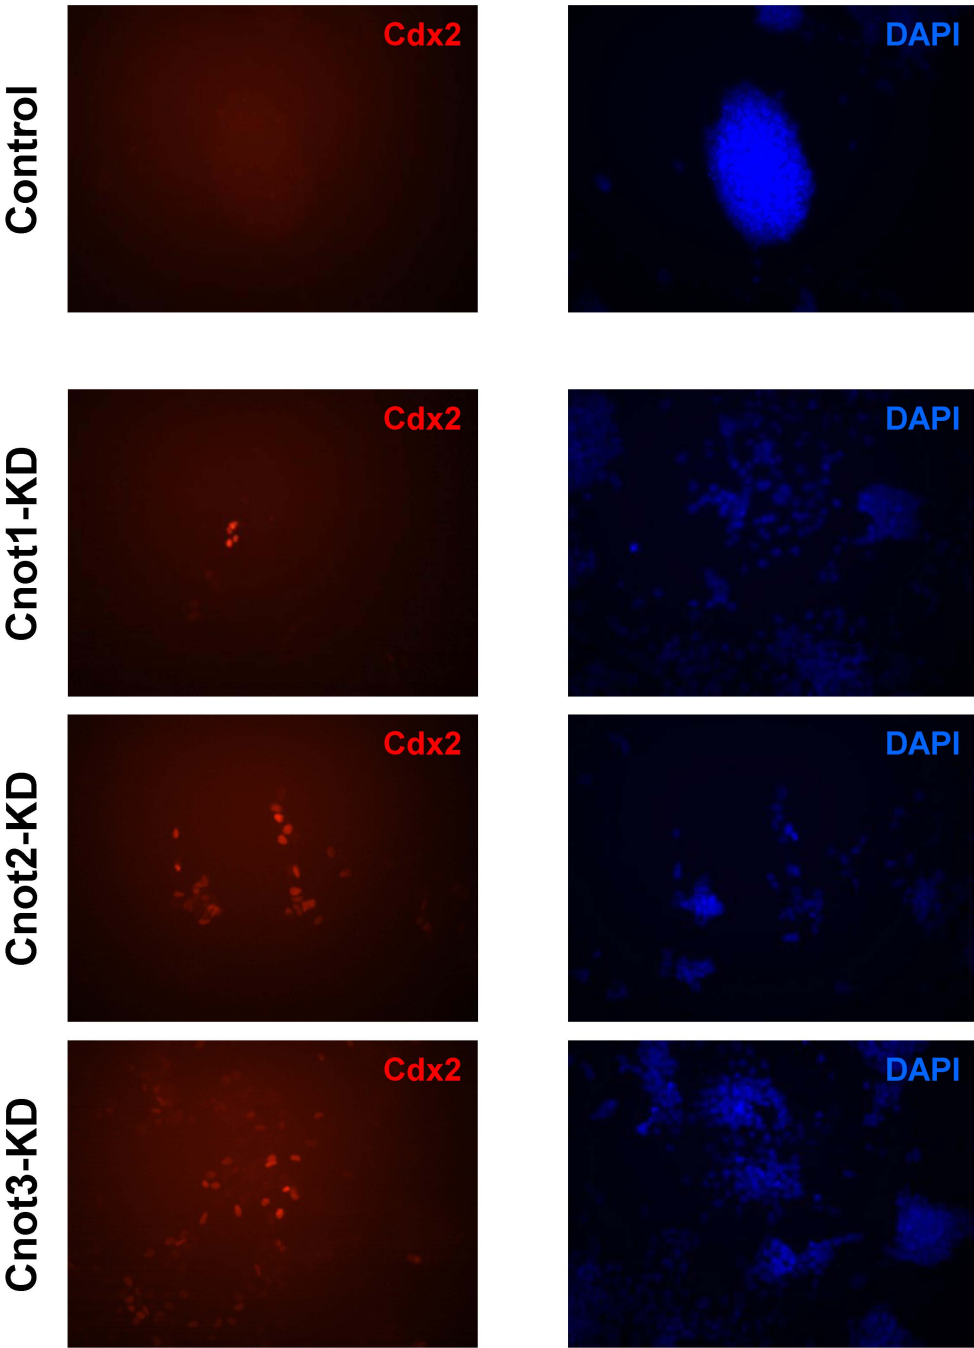

A

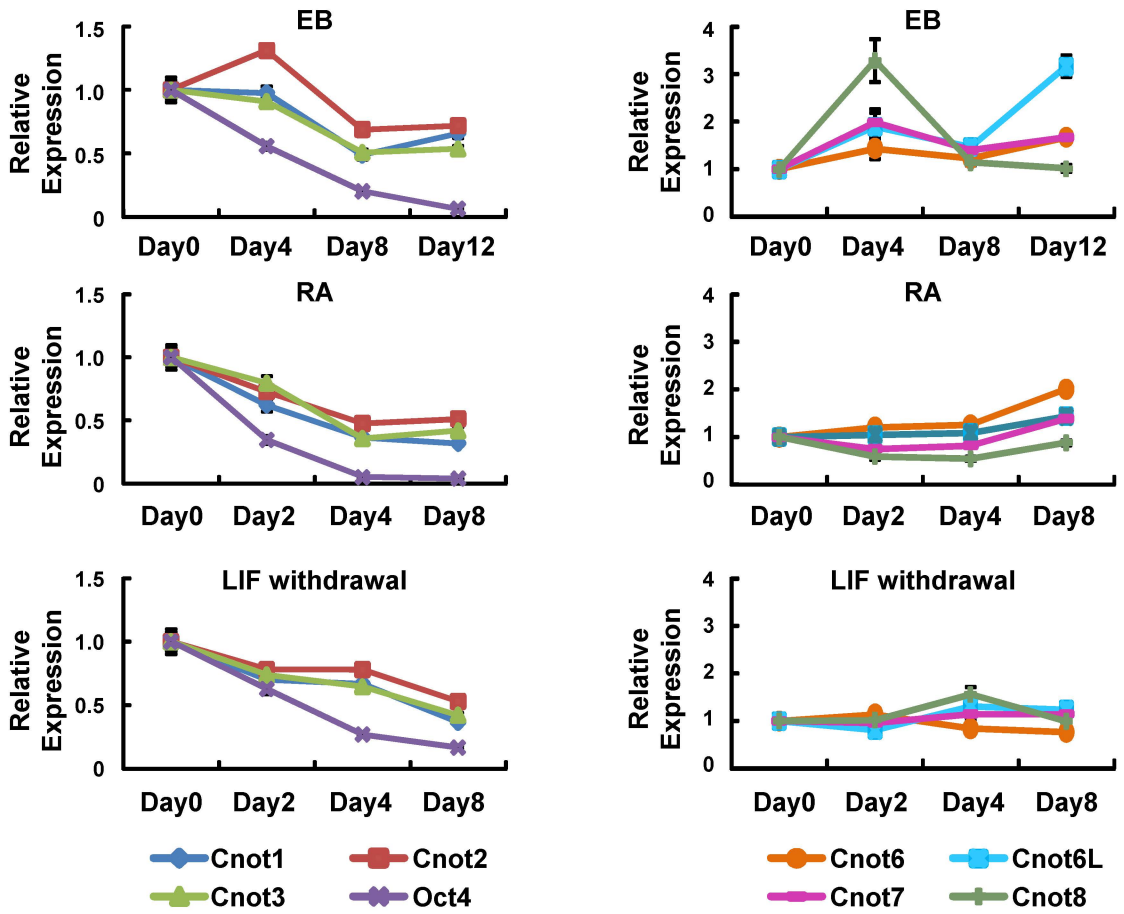

B

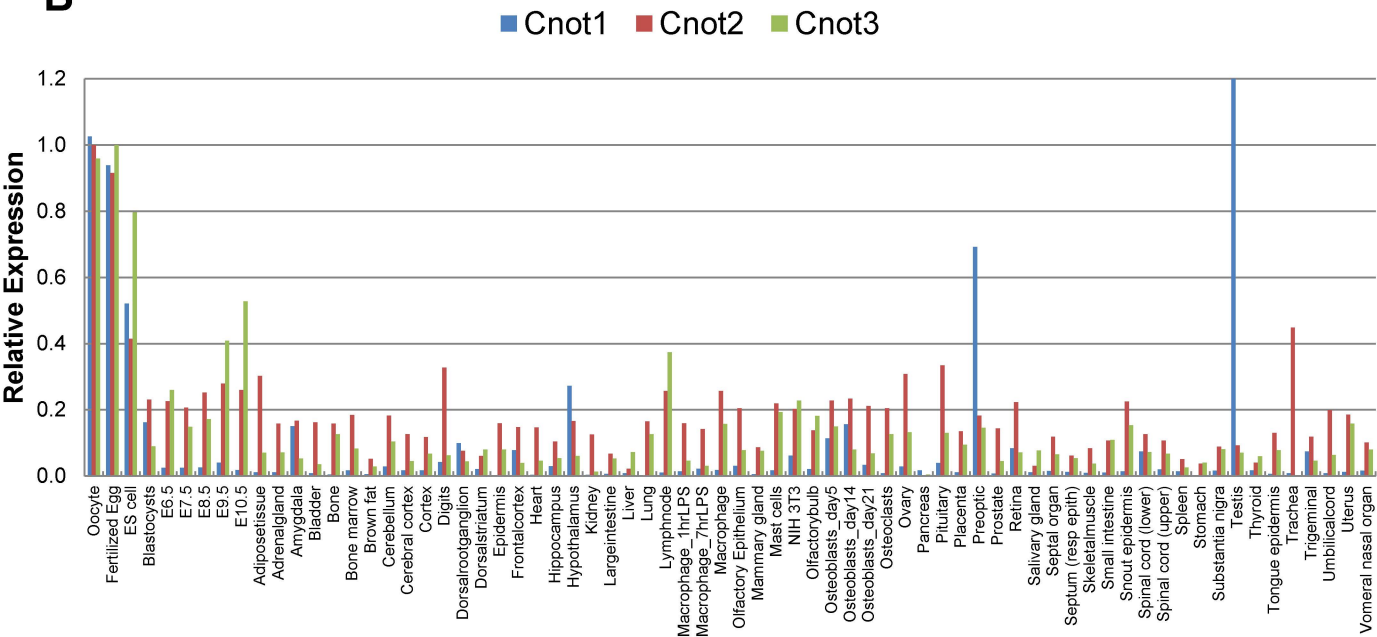

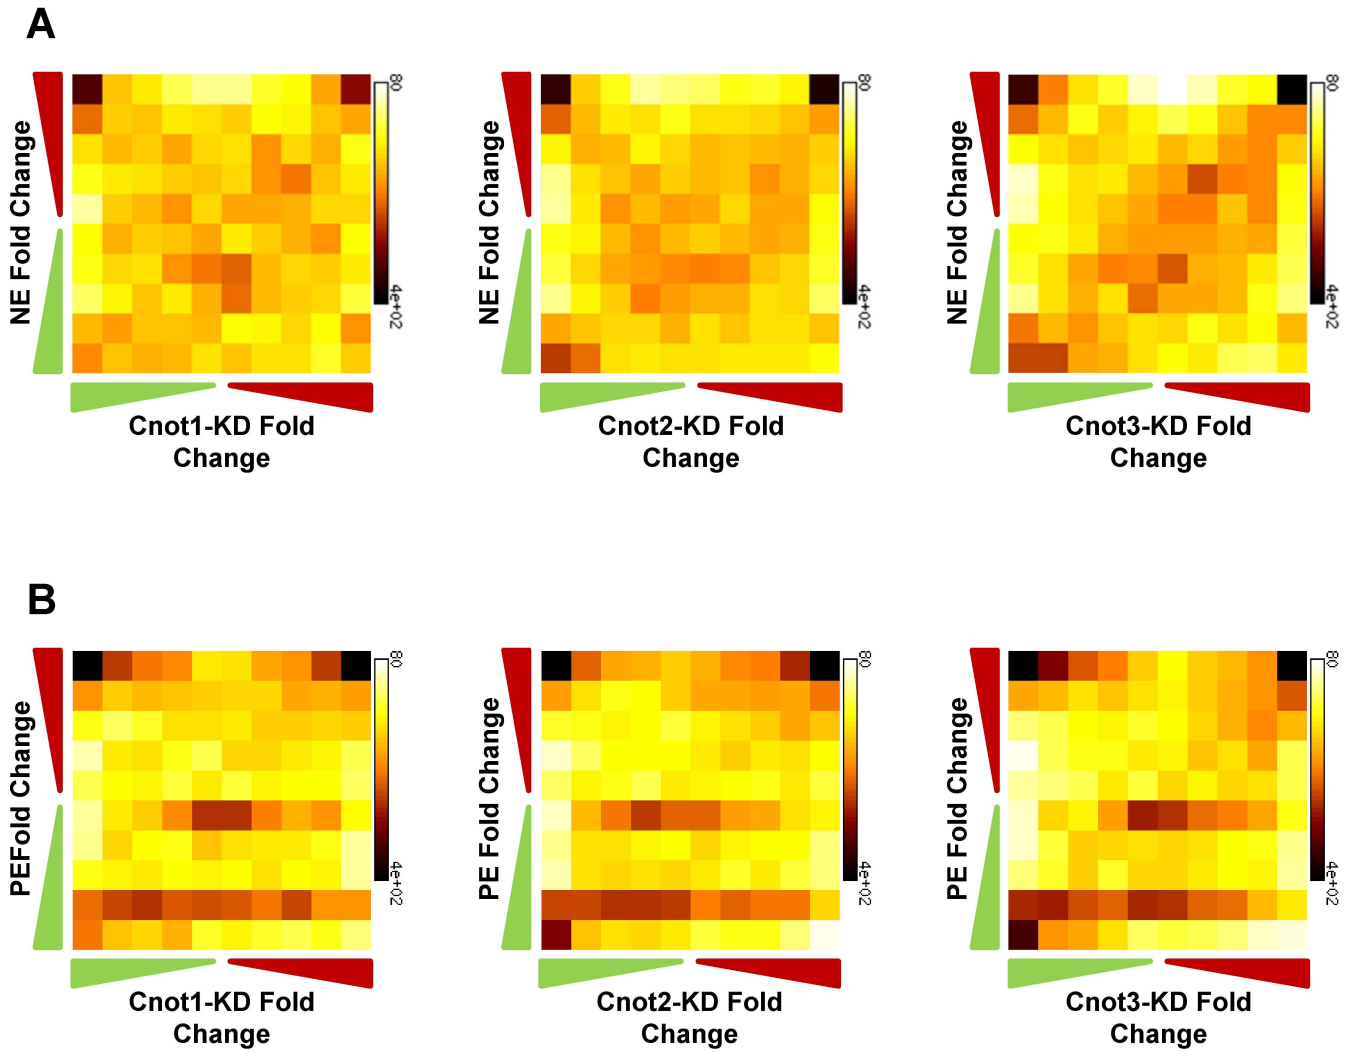



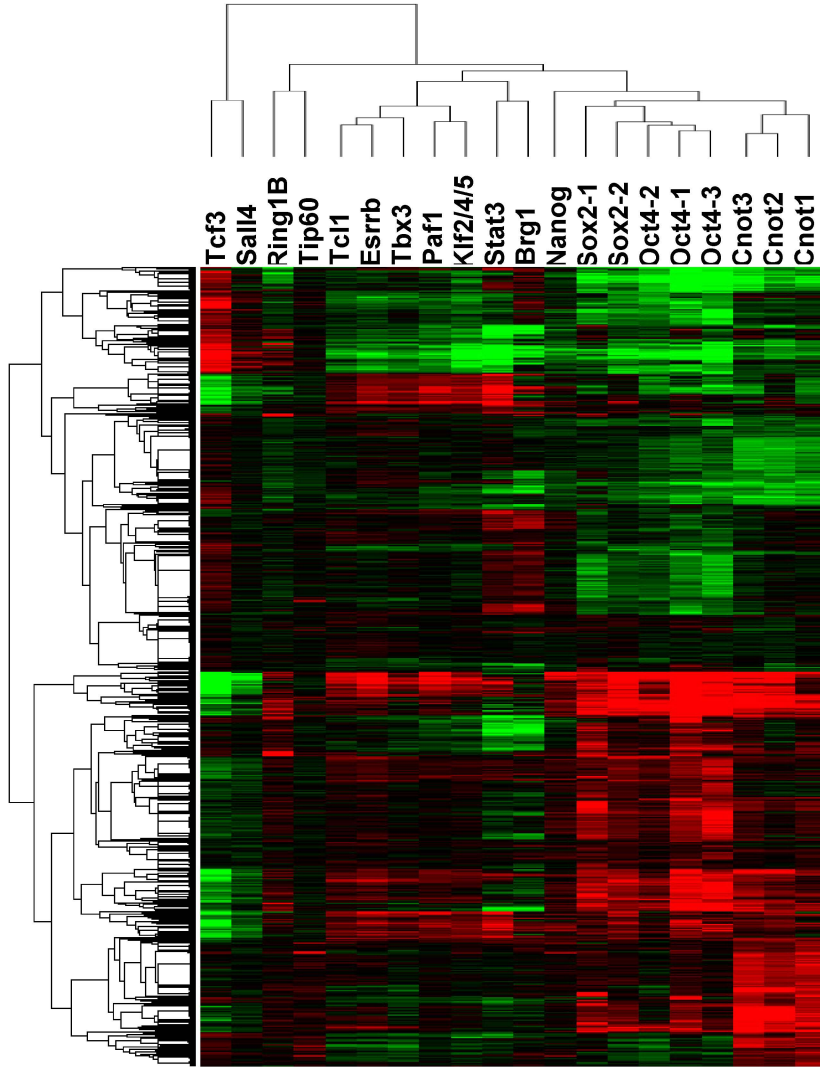

**A**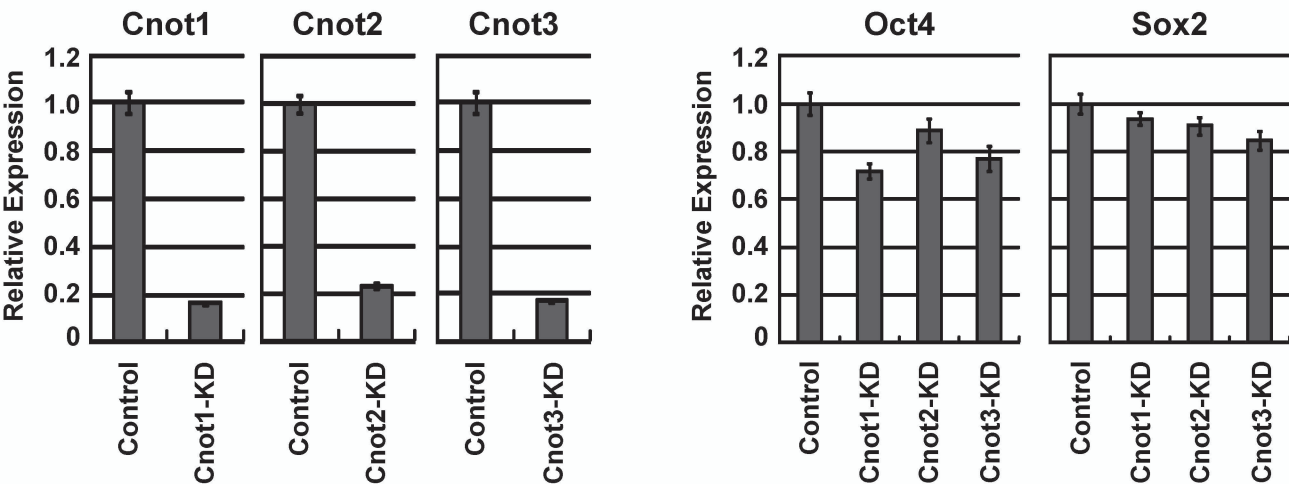**B**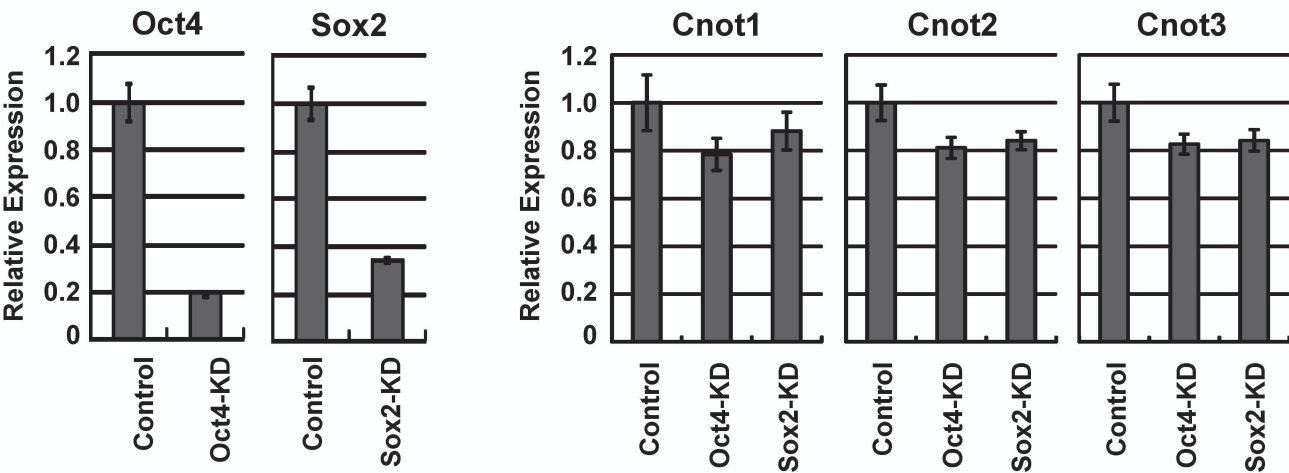

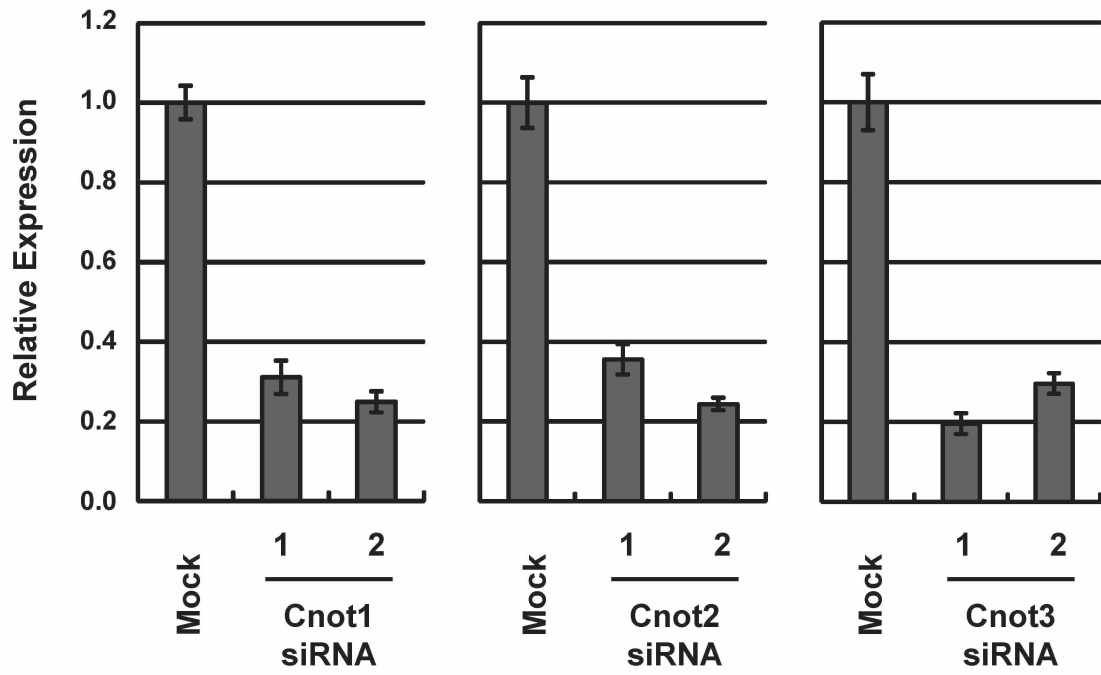

**A**

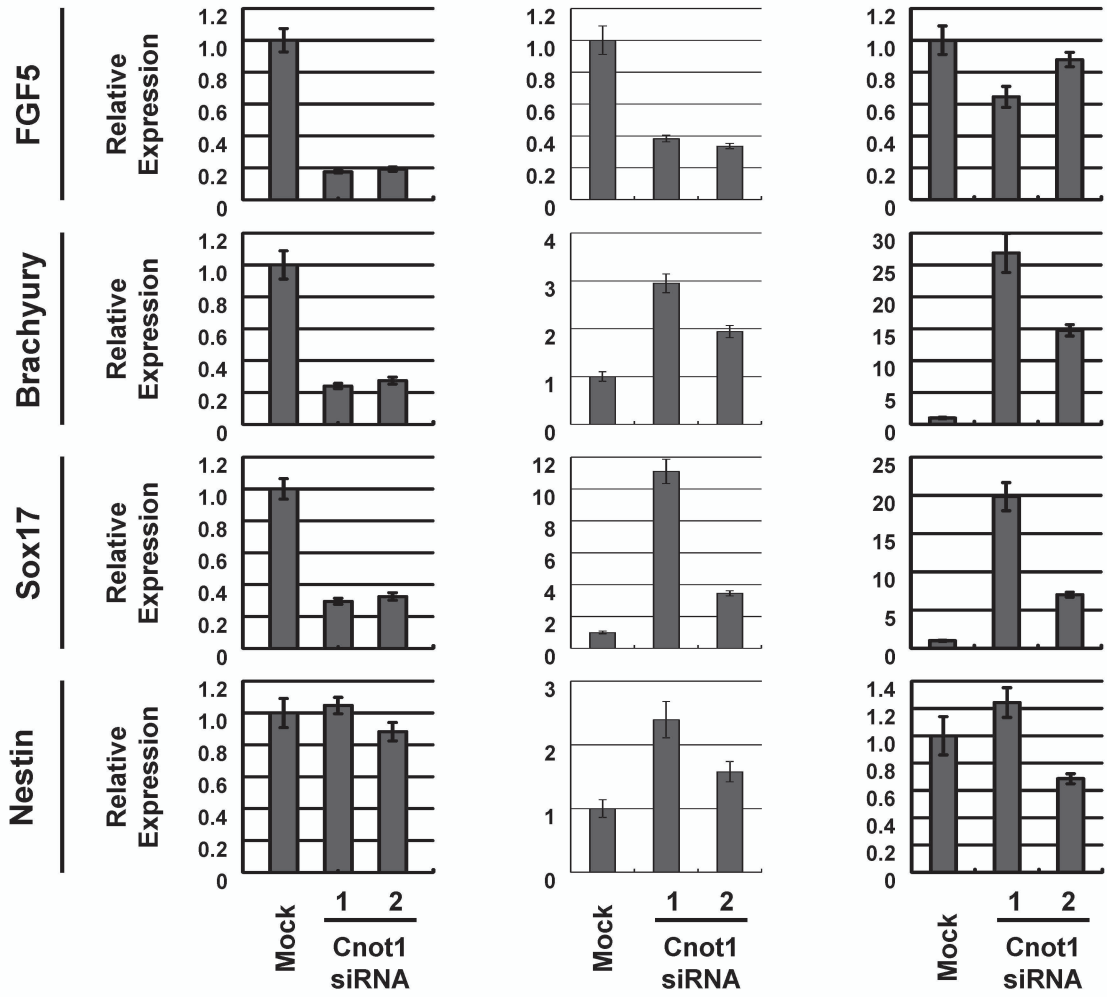

**B**

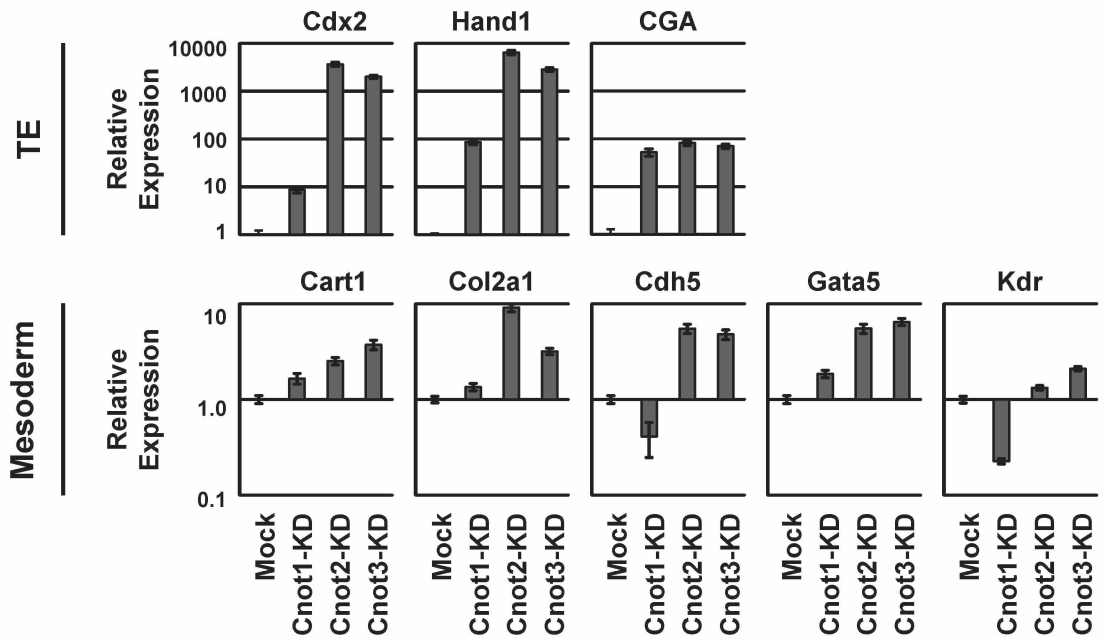

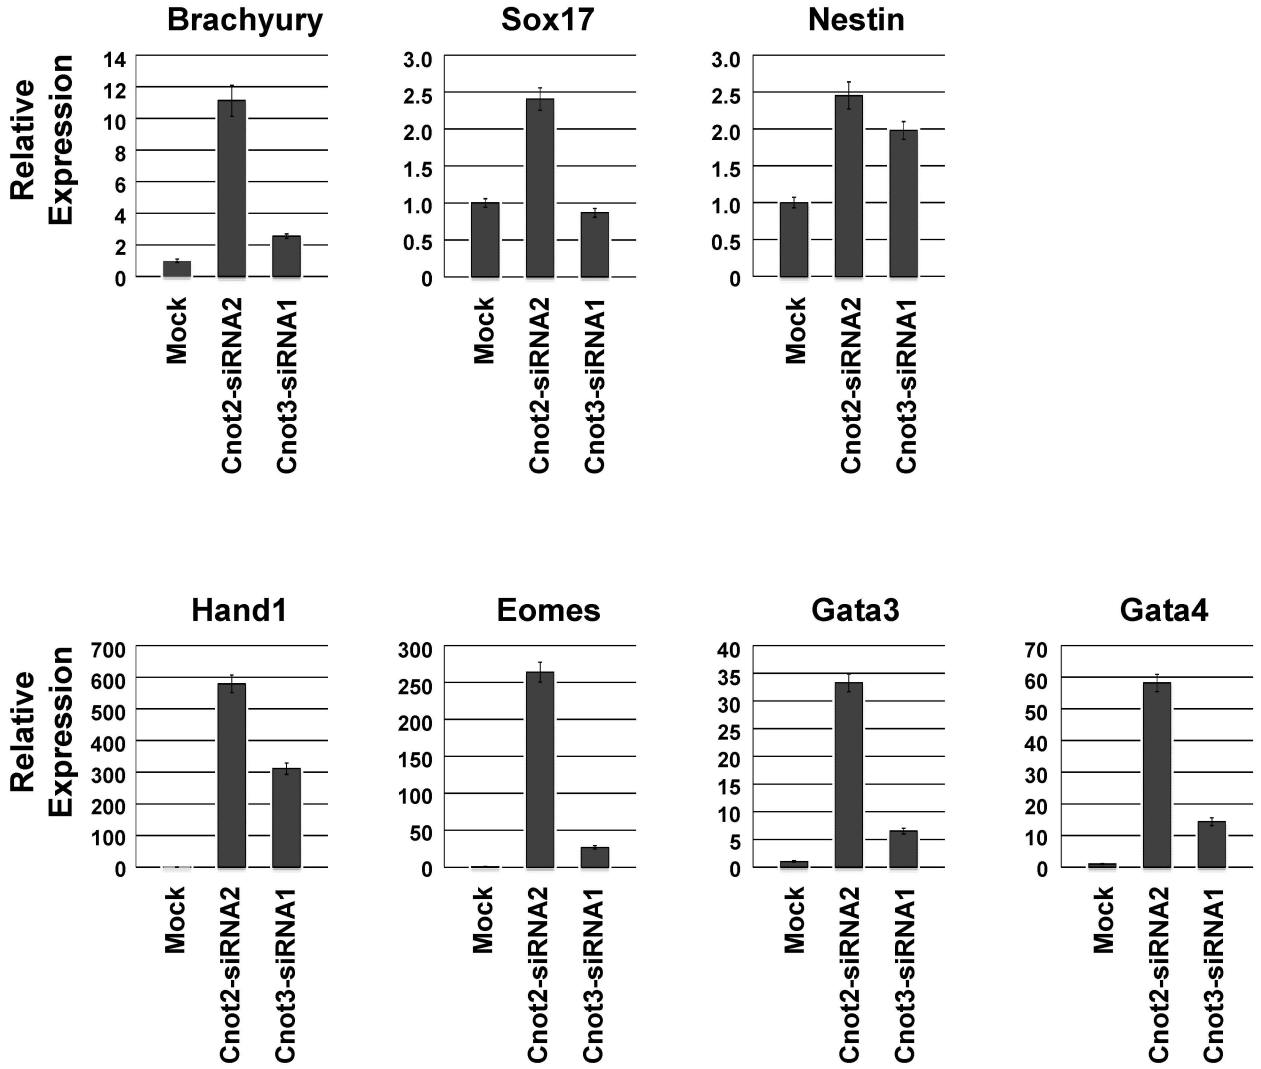

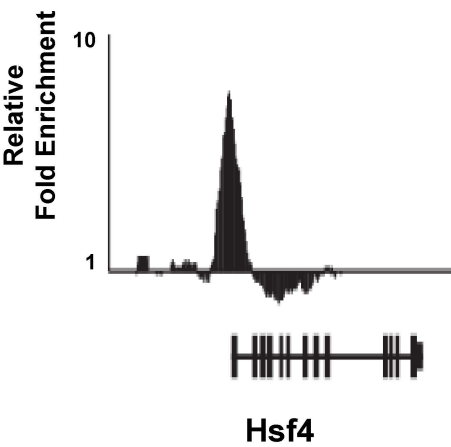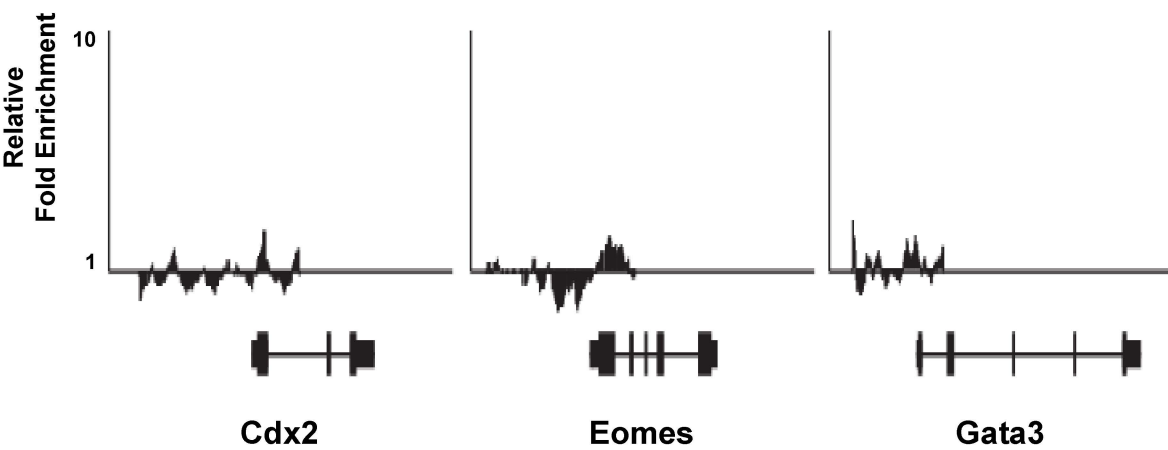

**Supplemental Table 1:**

| Gene       | Primer      | Sequence                     |
|------------|-------------|------------------------------|
| mAqp3      | Aqp3-L      | ctggggaccctcatcct            |
|            | Aqp3-R      | tggtgaggaagccacat            |
| mKrt       | Krt8-L      | agttcgctccttcattgac          |
|            | Krt8-R      | gctgcaacaggctccact           |
| mTcfap2c   | Tcfap2c-L   | gtatgaagaggattgcgagga        |
|            | Tcfap2c-R   | cgggactgtagagatggtgtcc       |
| mFoxd3     | Foxd3-L     | ccccaaactgaccaacag           |
|            | Foxd3-R     | gtttgctccgccagctta           |
| mLin28     | Lin28-L     | acatgcagaagcgaagatcc         |
|            | Lin28-R     | ccttgcatgatggtctagc          |
| mTcl1      | Tcl1-L      | gctgcccgtagtcacaaag          |
|            | Tcl1-R      | agctcccccaagggtgac           |
| mOct4      | Oct4-L      | tgaggctacaggacaccttc         |
|            | Oct4-R      | gtgccaaagtggggacct           |
| mNanog     | Nanog-L     | ttctgcttacaagggtctgc         |
|            | Nanog-R     | agaggaagggcgaggaga           |
| mSox2      | Sox2-L      | tgctgcctcttaagactaggg        |
|            | Sox2-R      | tcgggctccaaactctct           |
| mEsrrb     | Esrrb-L     | cgattcatgaaatgcctcaa         |
|            | Esrrb-R     | cctcctcgaactcgggtca          |
| mCdx2      | Cdx2-L      | ctgccacactgggctct            |
|            | Cdx2-R      | cttgctctcgggttctg            |
| mGata3     | Gata3-L     | atcaagcccaagcgaaggctgc       |
|            | Gata3-R     | tggtggtggtggtctgacagttcg     |
| mEomes     | Eomes-L     | acccgacctccctgctatg          |
|            | Eomes-R     | gtgggctcattctggatgct         |
| mBrachyury | Brachyury-L | cagcccactactggctcta          |
|            | Brachyury-R | gagcctggggtgatggta           |
| mHand1     | Hand1-R     | tctggctcgtctctctgctc         |
|            | Hand1-L     | ctcgagaaggcatcagggtga        |
| mFoxa2     | Foxa2-R     | cgagctaaaggagcacct           |
|            | Foxa2-L     | taatggtgctcgggcttc           |
| mFgf5      | Fgf5-R      | gttccagtggagcccttc           |
|            | Fgf5-L      | gagacacagcaaatattccaaaa      |
| mGoosecoid | Goosecoid-R | gagacgaagtaccagacgtg         |
|            | Goosecoid-L | ggcggttcttaaacagacc          |
| mTead4     | Tead4-R     | atgccttcttctgtgaagtctgg      |
|            | Tead4-L     | tcgtagagcaggtgataatcatgtctcc |

|            |              |                            |
|------------|--------------|----------------------------|
| mGata4     | Gata4-R      | ggaagacaccccaatctcg        |
|            | Gata4-L      | catggccccacaattgac         |
| mGata6     | Gata6-R      | ggtctctacagcaagatgaatgg    |
|            | Gata6-L      | tggcacaggacagtccaag        |
| mSox1      | Sox1-R       | ggagaccgacctgcactc         |
|            | Sox1-L       | atcctggttgccttgg           |
| mNestin    | Nestin-R     | ctgcaggccactgaaaagtt       |
|            | Nestin_L     | gaccctgcttctctctctc        |
| mSox17     | Sox17-R      | tcagccttctatttccccaagaggtc |
|            | Sox17-L      | agaccgaccccgagctctgctatg   |
| hOct4      | hOct4 -L     | TGCCGTGAAACTGGAGAAG        |
|            | hOct4 -R     | GCTTGGCAAATTGTTTCGAGT      |
| hTubulin   | hTubulin-L   | TTACCTCGACTCTTAGCTTGTCG    |
|            | hTubulin-R   | GGATGGAGATGCACTCACG        |
| hCnot2     | hCnot2-L     | GGTAACCCAACTCCATTAATAAACC  |
|            | hCnot2-R     | TGCTGGTTTTGTTACCATTCC      |
| hCnot3     | hCnot3-L     | CTGTGCGGATACGCTCCT         |
|            | hCnot3-R     | TCTCTTCATACTCTCTTGGAGACG   |
| hNestin    | hNestin-L    | TGCGGGCTACTGAAAAGTTC       |
|            | hNestin-R    | TGTAGGCCCTGTTTCTCCTG       |
| hCdx2      | hCdx2-L      | ATCACCATCCGGAGGAAAG        |
|            | hCdx2-R      | TGCGGTTCTGAAACCAGATT       |
| hSox17     | hSox17 -L    | ACGCCGAGTTGAGCAAGA         |
|            | hSox17 -R    | TCTGCCTCCTCCACGAAG         |
| hBrachyury | hBrachyury-L | GGGTCCACAGCGCATGAT         |
|            | hBrachyury-R | TGATAAGCAGTCACCGCTATGAA    |
| hEomes     | hEomes-L     | ATCATTACGAAACAGGGCAGGC     |
|            | hEomes-R     | CGGGGTTGGTATTTGTGTAAGG     |
| hGoosecoid | hGoosecoid-L | CCTCCGCGAGGAGAAAGT         |
|            | hGoosecoid-R | CGTTCTCCGACTCCTCTGAT       |
| hGata4     | hGata4-L     | GGAAGCCCAAGAACCTGAAT       |
|            | hGata4-R     | GTTGCTGGAGTTGCTGGAA        |
| hHand1     | hHand1-L     | AACTCAAGAAGGCGGATGG        |
|            | hHand1-R     | GGAGGAAAACCTTCGTGCT        |
| hGata3     | hGata3-L     | CTCATTAAGCCCAAGCGAAG       |
|            | hGata3-R     | GTCTGACAGTTCGCACAGGA       |
| hGata6     | hGata6-L     | GCGGGCTCTACAGCAAGA         |
|            | hGata6-R     | TGGCACAGGACAATCCAAG        |
| hFgf5      | hFgf5-L      | TCCAACCTCCCTGGTTTAAGG      |
|            | hFgf5-R      | CGTGGTGGCATGAGTCTGTA       |
| hActin     | hActin-L     | CCAACCGCGAGAAGATGA         |



|         |           |                         |
|---------|-----------|-------------------------|
|         | hActin-R  | CCAGAGGCGTACAGGGATAG    |
| hCart1  | hCart1-L  | ACTATAAAAGGTGGGAGCGC    |
|         | hCart1-R  | ACACGTCAAGGGGGTCGAGA    |
| hCga    | hCGA-L    | GTTTCTGCATGTTCTCCATTC   |
|         | hCGA-R    | GTGGACTCTGAGGTGACG      |
| hCol2A1 | hCol2A1-L | TGGCCTGAGACAGCATGAC     |
|         | hCol2A1-R | AGTGTTGGGAGCCAGATTGT    |
| hGata5  | hGata5-L  | GAACAGCCTGGAACAGACCA    |
|         | hGata5-R  | TCCCTCACCAGCCTTCTTGC    |
| hKdr    | hKDR-L    | GAACATTTGGGAAATCTCTTGC  |
|         | hKDR-R    | CGGAAGAACAATGTAGTCTTTGC |
| hCdh5   | hCdh5-L   | AAGCCTCTGATTGGCACAGT    |
|         | hCdh5-R   | CTGGCCCTTGTCAGTGGT      |

**Supplemental Table 2:**

| <b>Citation</b>         | <b>PMID</b> | <b>Accession</b> | <b>Gene(s)</b>                                    |
|-------------------------|-------------|------------------|---------------------------------------------------|
| Loh et al. (2006)       | 16518401    | GSE4189          | Oct4 (Oct4-1), Nanog KD                           |
| Ivanova et al. (2006)   | 16767105    | GSE4679          | Oct4 (Oct4-2), Sox2 (Sox-2), Tc11, Esrrb, Tbx3 KD |
| Masui et al. (2007)     | 17515932    | GSE5895          | Sox2 KO (Sox2-1)                                  |
| Jiang et al. (2008)     | 18264089    | GSE9775          | Klf2,4,5 triple KO                                |
| Fazzio et al. (2008)    | 18614019    | GSE11240         | Tip60 KD                                          |
| Lim et al. (2008)       | 18804426    | GSE12482         | Sall4 KD                                          |
| Ding et al. (2009)      | 19345177    | GSE12078         | Paf1 KD                                           |
| Leeb et al. (2010)      | 20123906    | GSE19076         | Ring1B KO                                         |
| Merrill et al. (2011)   | 21685894    | GSE27455         | Tcf3 KO                                           |
| Ho et al. (2011)        | 21785422    | GSE27708         | LIF starvation (Stat3)                            |
| Ho et al. (2009)        | 19279218    | GSE14344         | Brg1 KO                                           |
| Nishiyama et al. (2009) | 19796622    | GSE16148         | Cdx2 overexpression (72 hr)                       |
| Aiba et al. (2009)      | 19112179    | GSE11523         | Gata6 (G4), N2B27 (N4)                            |

Note: Microarray data of Oct4 silencing in Oct4GiP cells generated by Dr. Raja Jothi and Guang Hu (Oct4-3) were used in the analysis. The raw data will be described elsewhere.

Vector Maps:

pHAGE-EF-HA-Puro-DEST

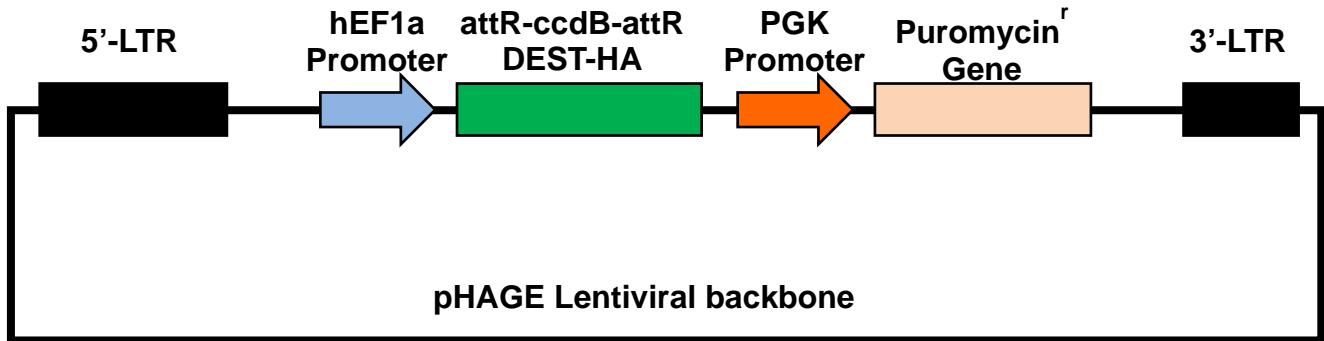

pHAGE-EF-HA-Neo-DEST

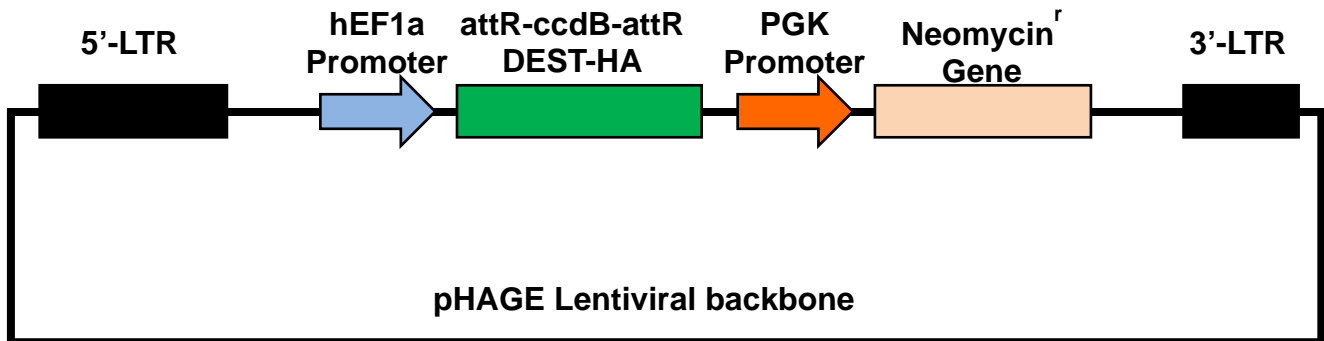

Supplement: NIHMS510644-supplement-supplement.pdf [file NIHMS510644-supplement-supplement.pdf]
